# Supplementary material for: Efficient mitochondrial targeting relies on co-operation of multiple protein signals in plants
Source: PubMed Central journal article supplement — J Exp Bot. 2008 Dec 26;60(3):741–9. doi: 10.1093/jxb/ern319 (PMC2652046; doi:10.1093/jxb/ern319), 2008-12-26
Supplement: ern319_1.pdf [file ern319_1.pdf]

## **EFFICIENT MITOCHONDRIAL TARGETING RELIES ON COOPERATION OF MULTIPLE PROTEIN SIGNALS IN PLANTS**

Laurent Chatre, Loren A Matheson, Andrew S Jack, Sally L Hanton and Federica Brandizzi

### **Supplemental data 1. MITS1<sup>12-573</sup> does not localize at Golgi bodies.**

Consistent with the localization of MITS1<sup>12-39</sup> MITS1<sup>12-573</sup> was not localized at Golgi stacks (arrowheads), as shown in cells co-expressing ERD2-GFP. MITS1<sup>12-573</sup> was localized at other organelles (full arrows) that correspond to mitochondria as demonstrated in Figure 4B and ER (empty arrows) as deduced from colocalization of the signal on the ER strands labelled by ERD2-GFP. Insets: magnified section of main panels. Scale bars = 5µm.

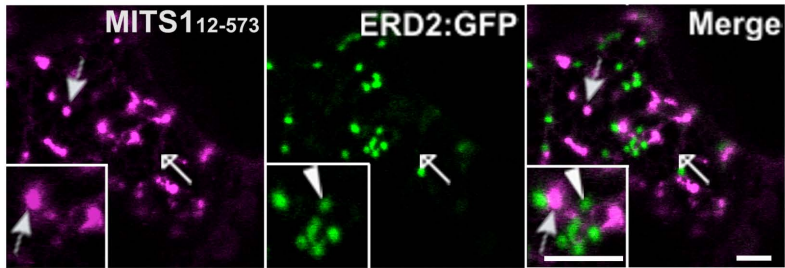

Supplemental data 1
